# Supplementary material for: Aurantiamide-related dipeptide derivatives are formyl peptide receptor 1 antagonists
Source: Royal Society of Chemistry journal article supplement (doi:10.1039/c9md00336c), 2019-01-01

## Supplementary Information

### **Aurantiamide-related dipeptide derivatives are formyl peptide receptor 1 antagonists**

Margherita Mastromarino, Liliya N. Kirpotina, Igor A. Schepetkin, Mark T. Quinn, Enza Lacivita,  
and Marcello Leopoldo

**Content:**

<sup>1</sup>H spectra of final compounds.

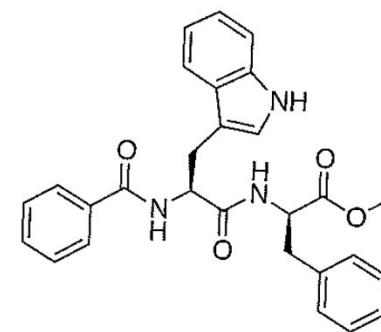

(2R,2'S)-6

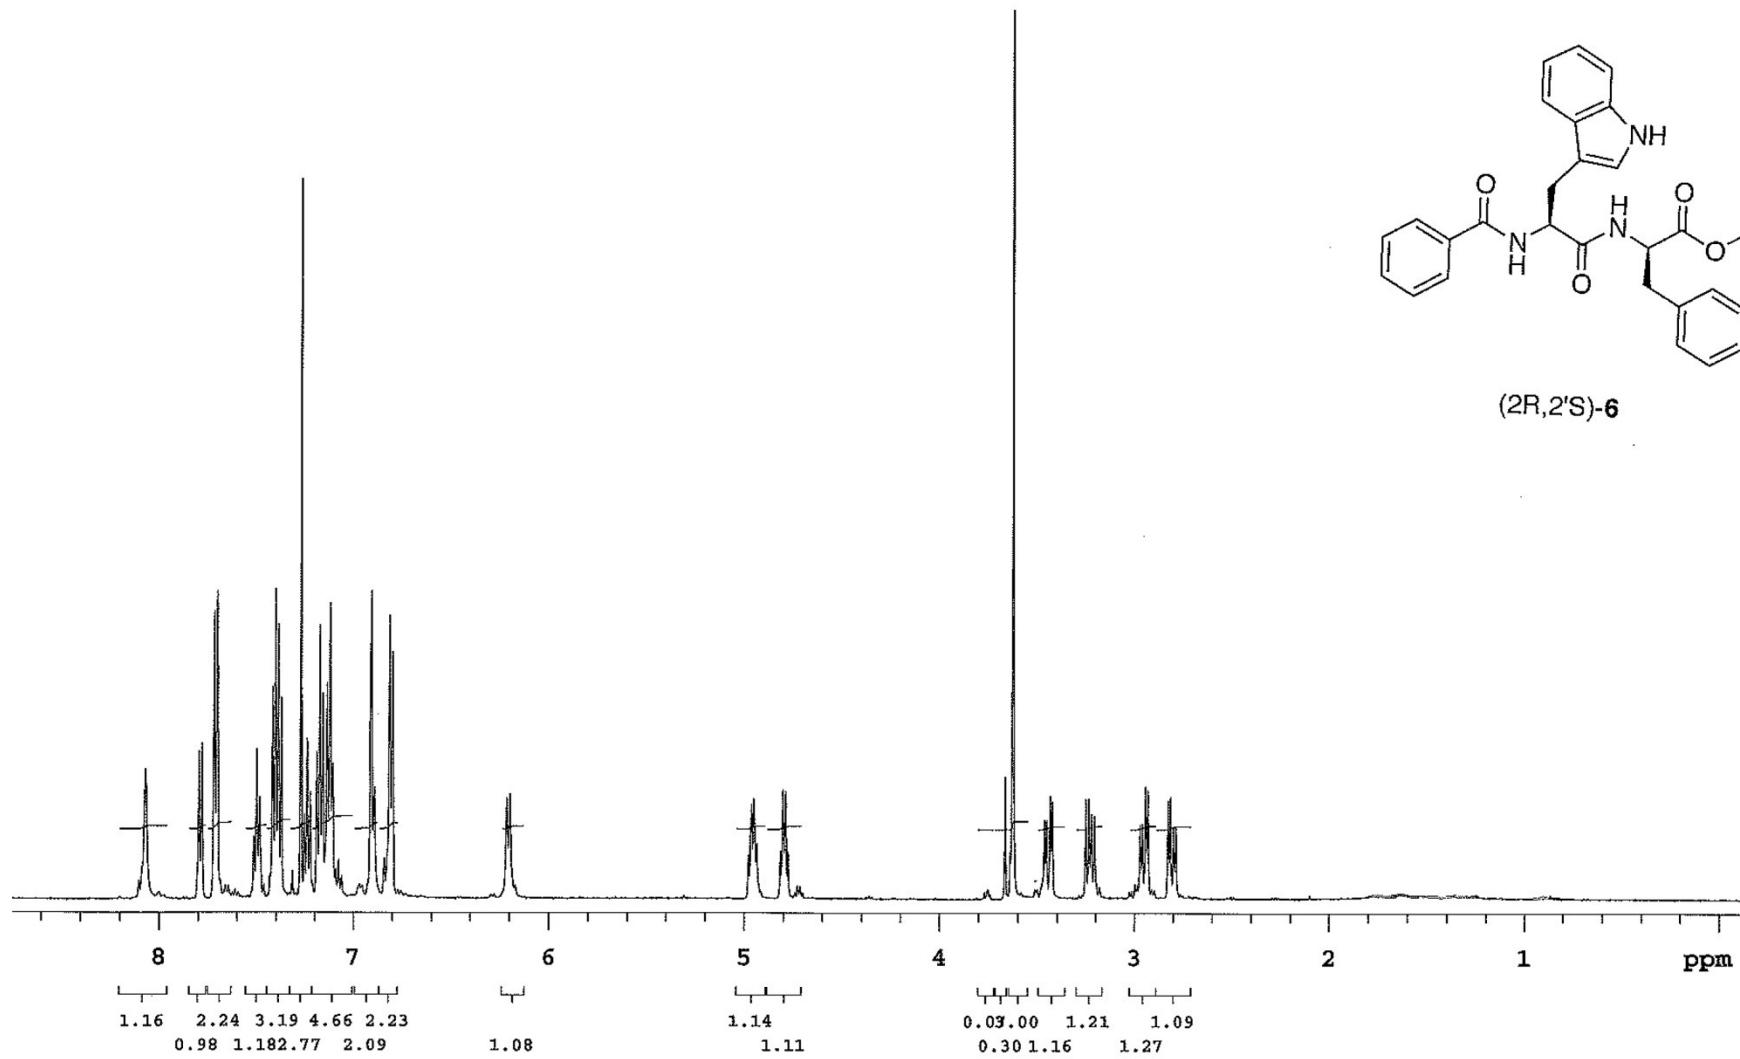

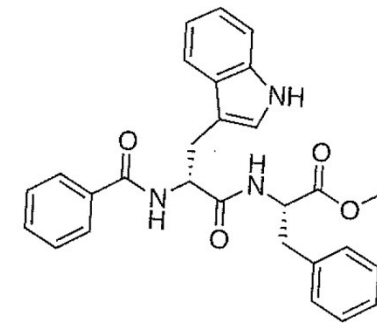

(2S,2'R)-6

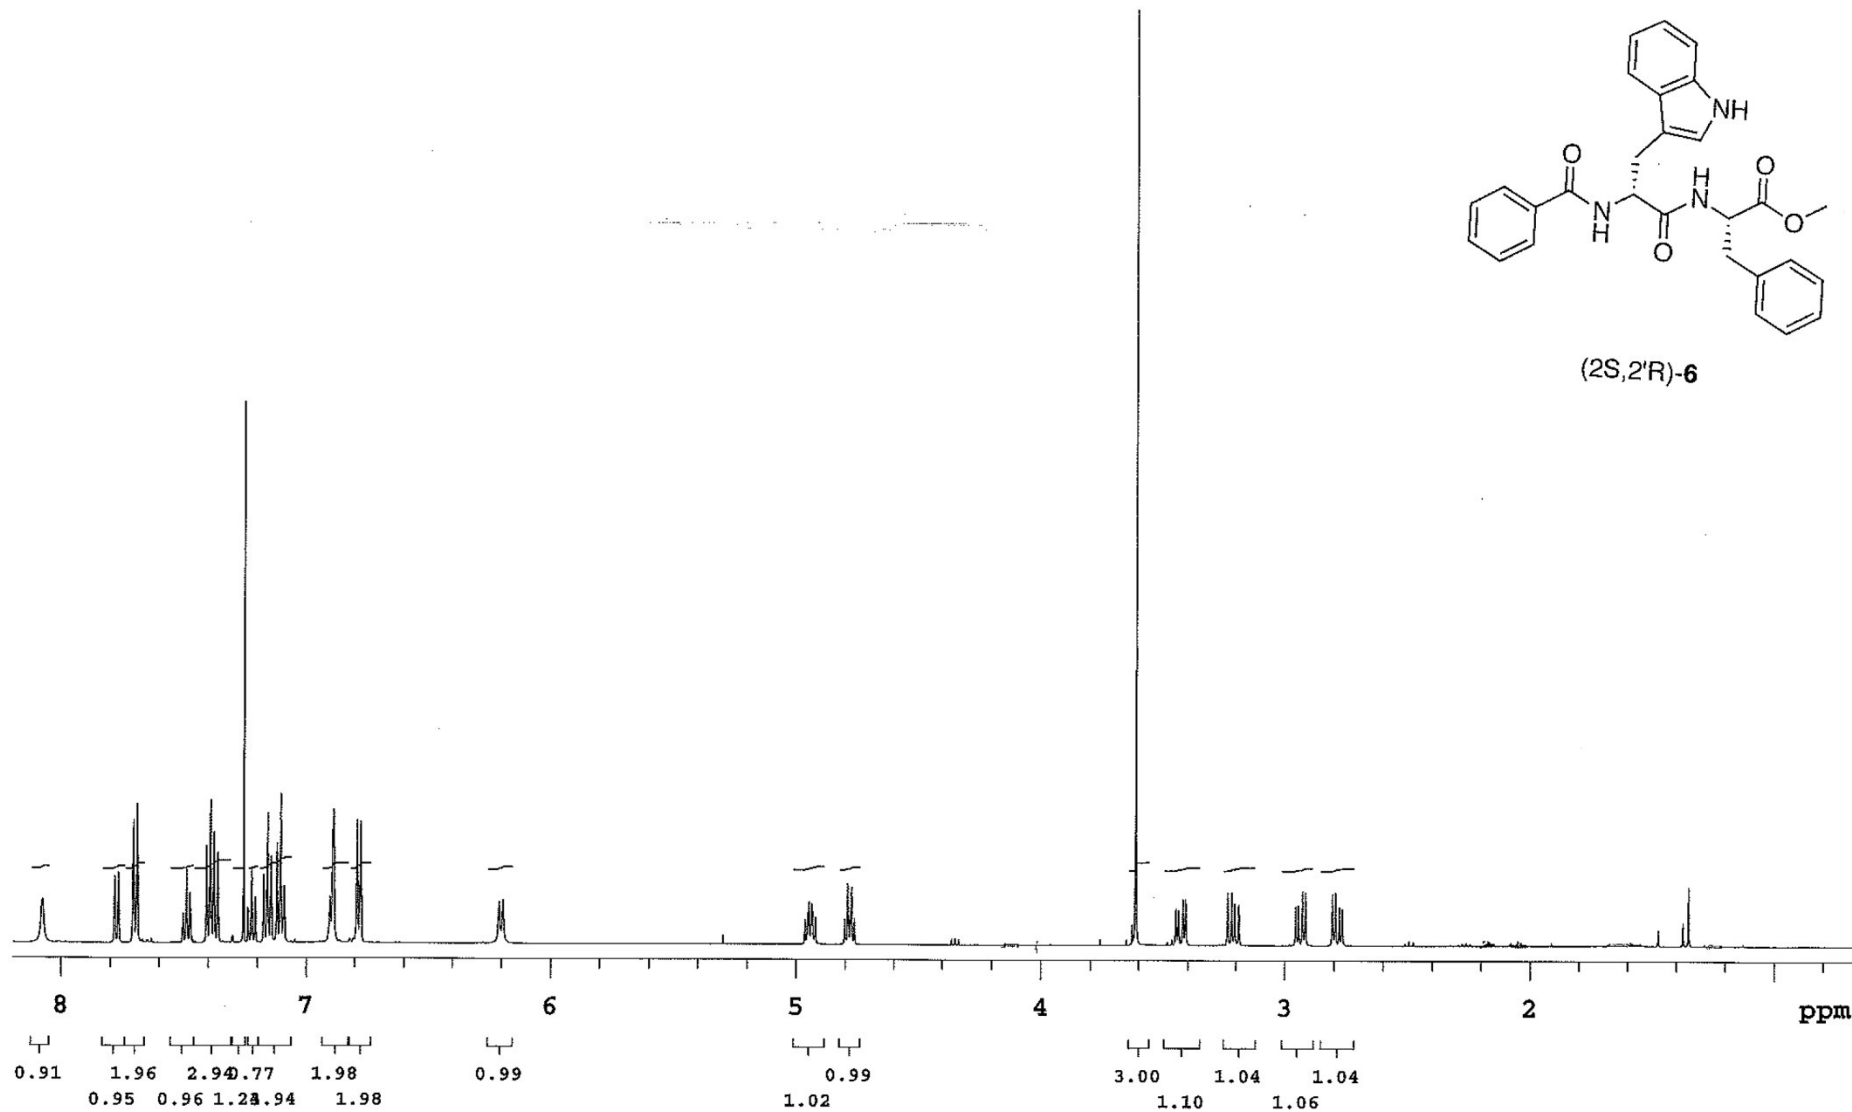

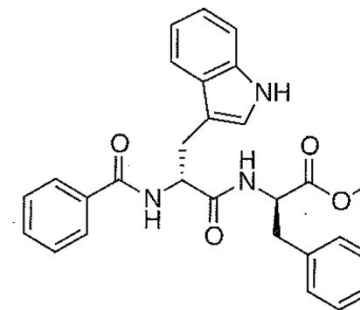

(2S,2'S)-6

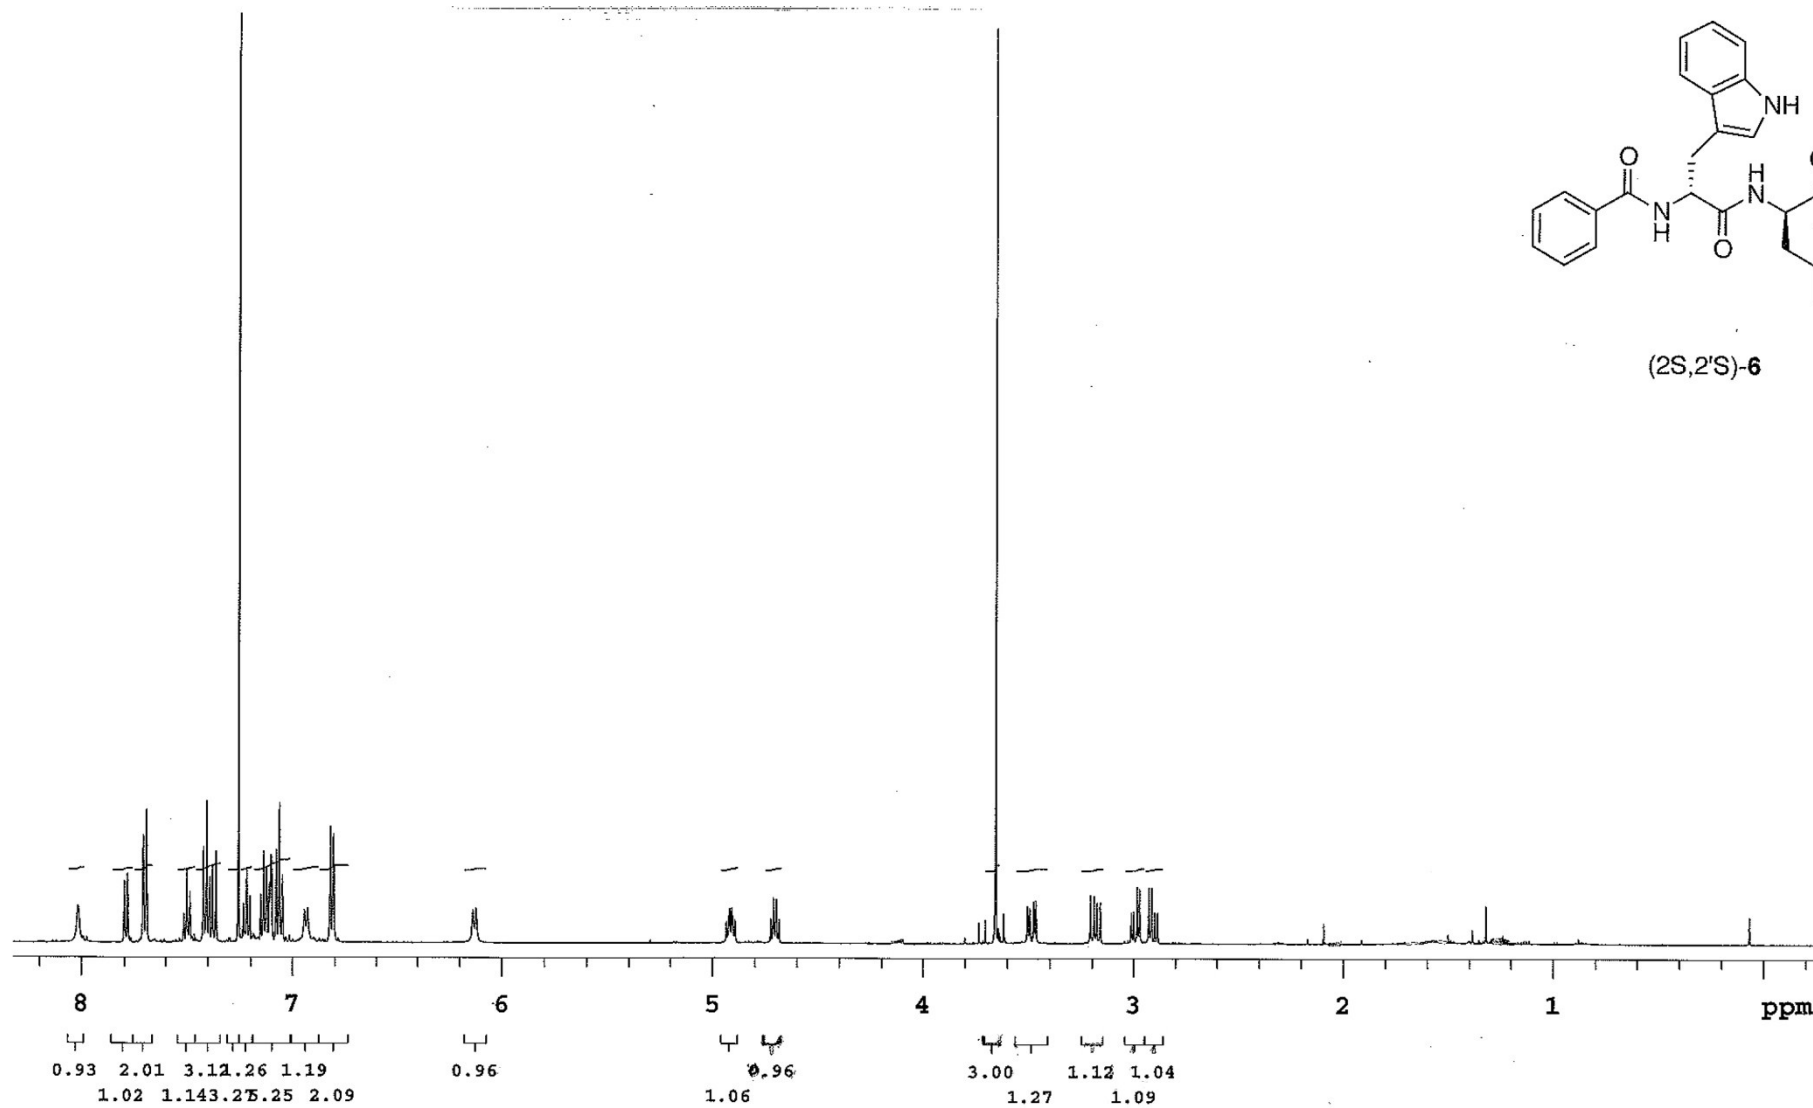

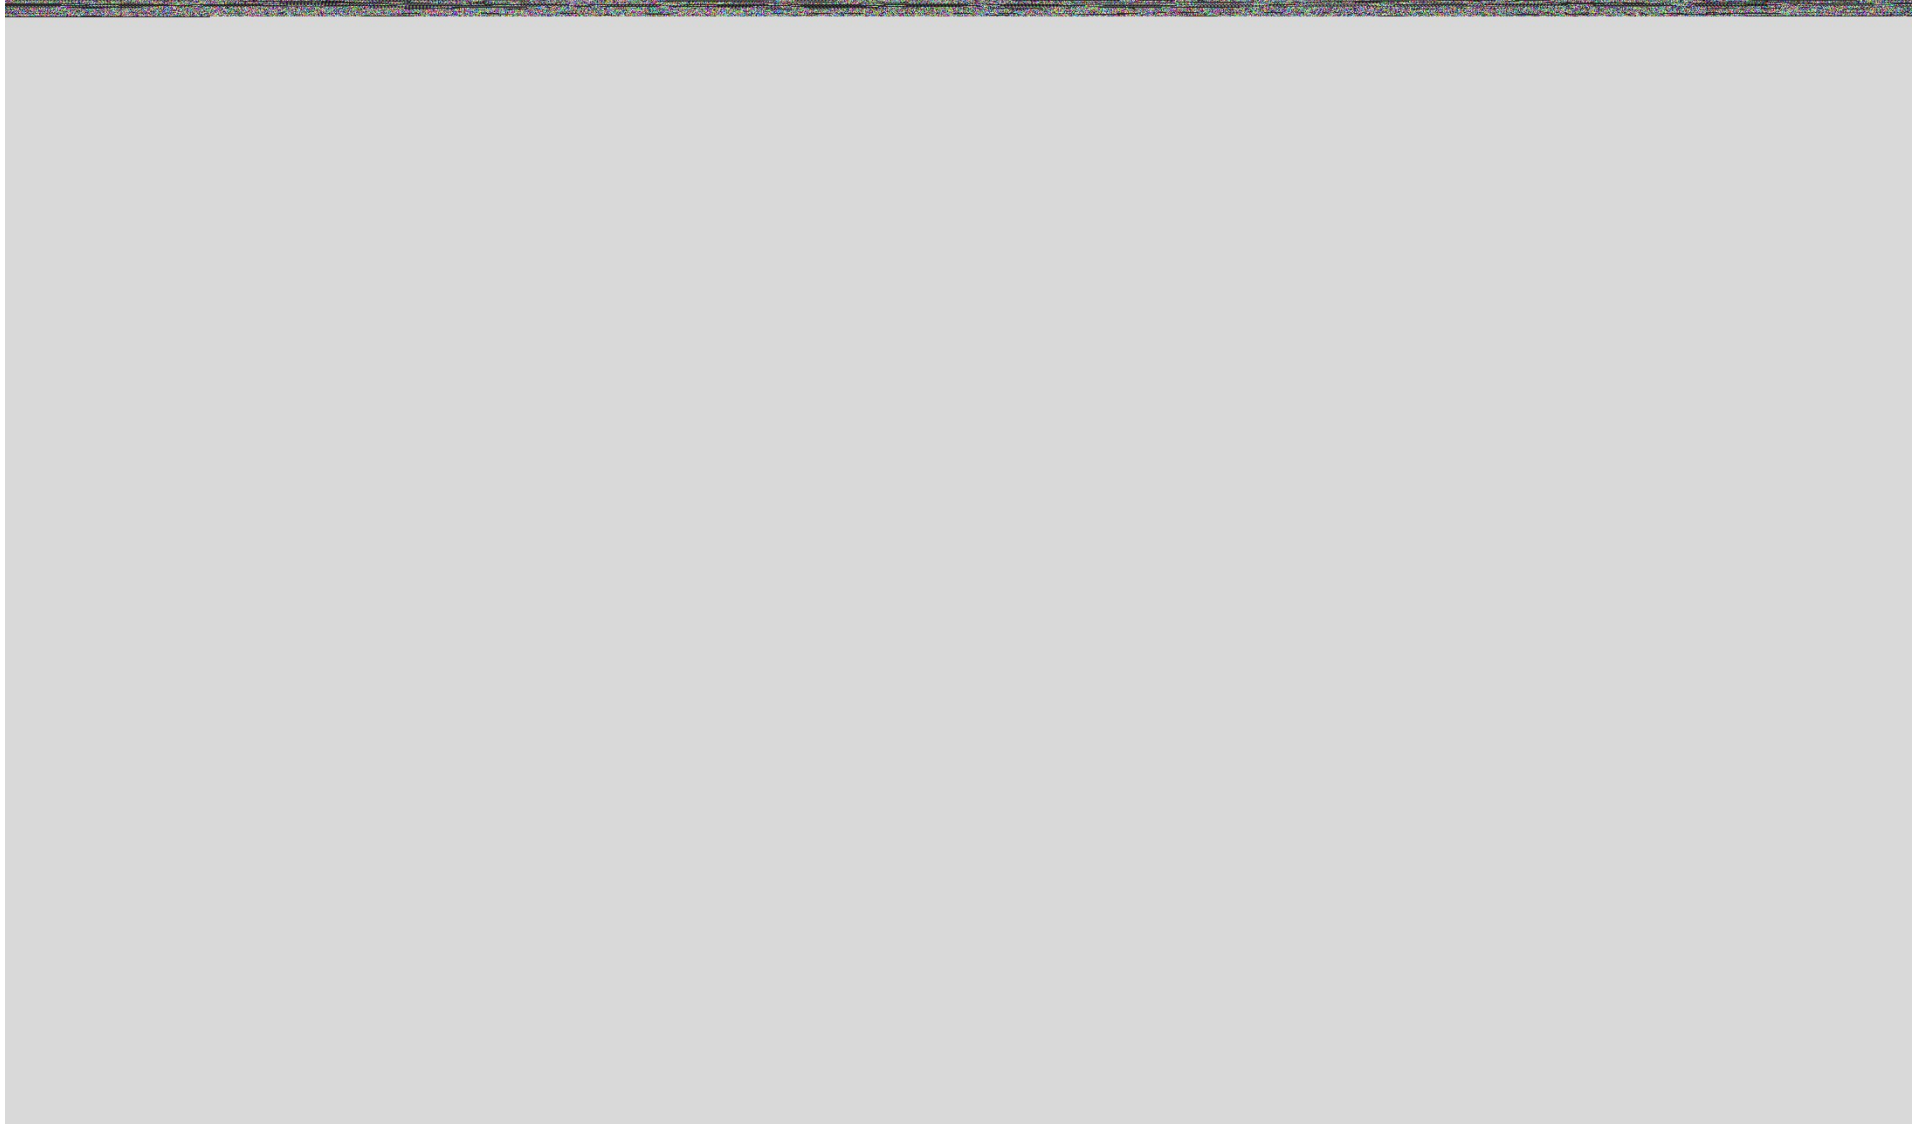

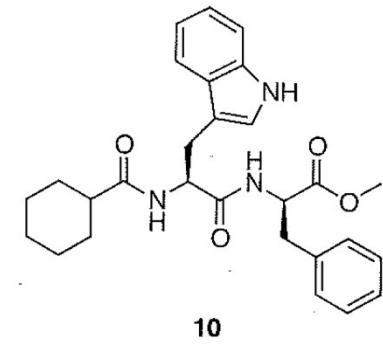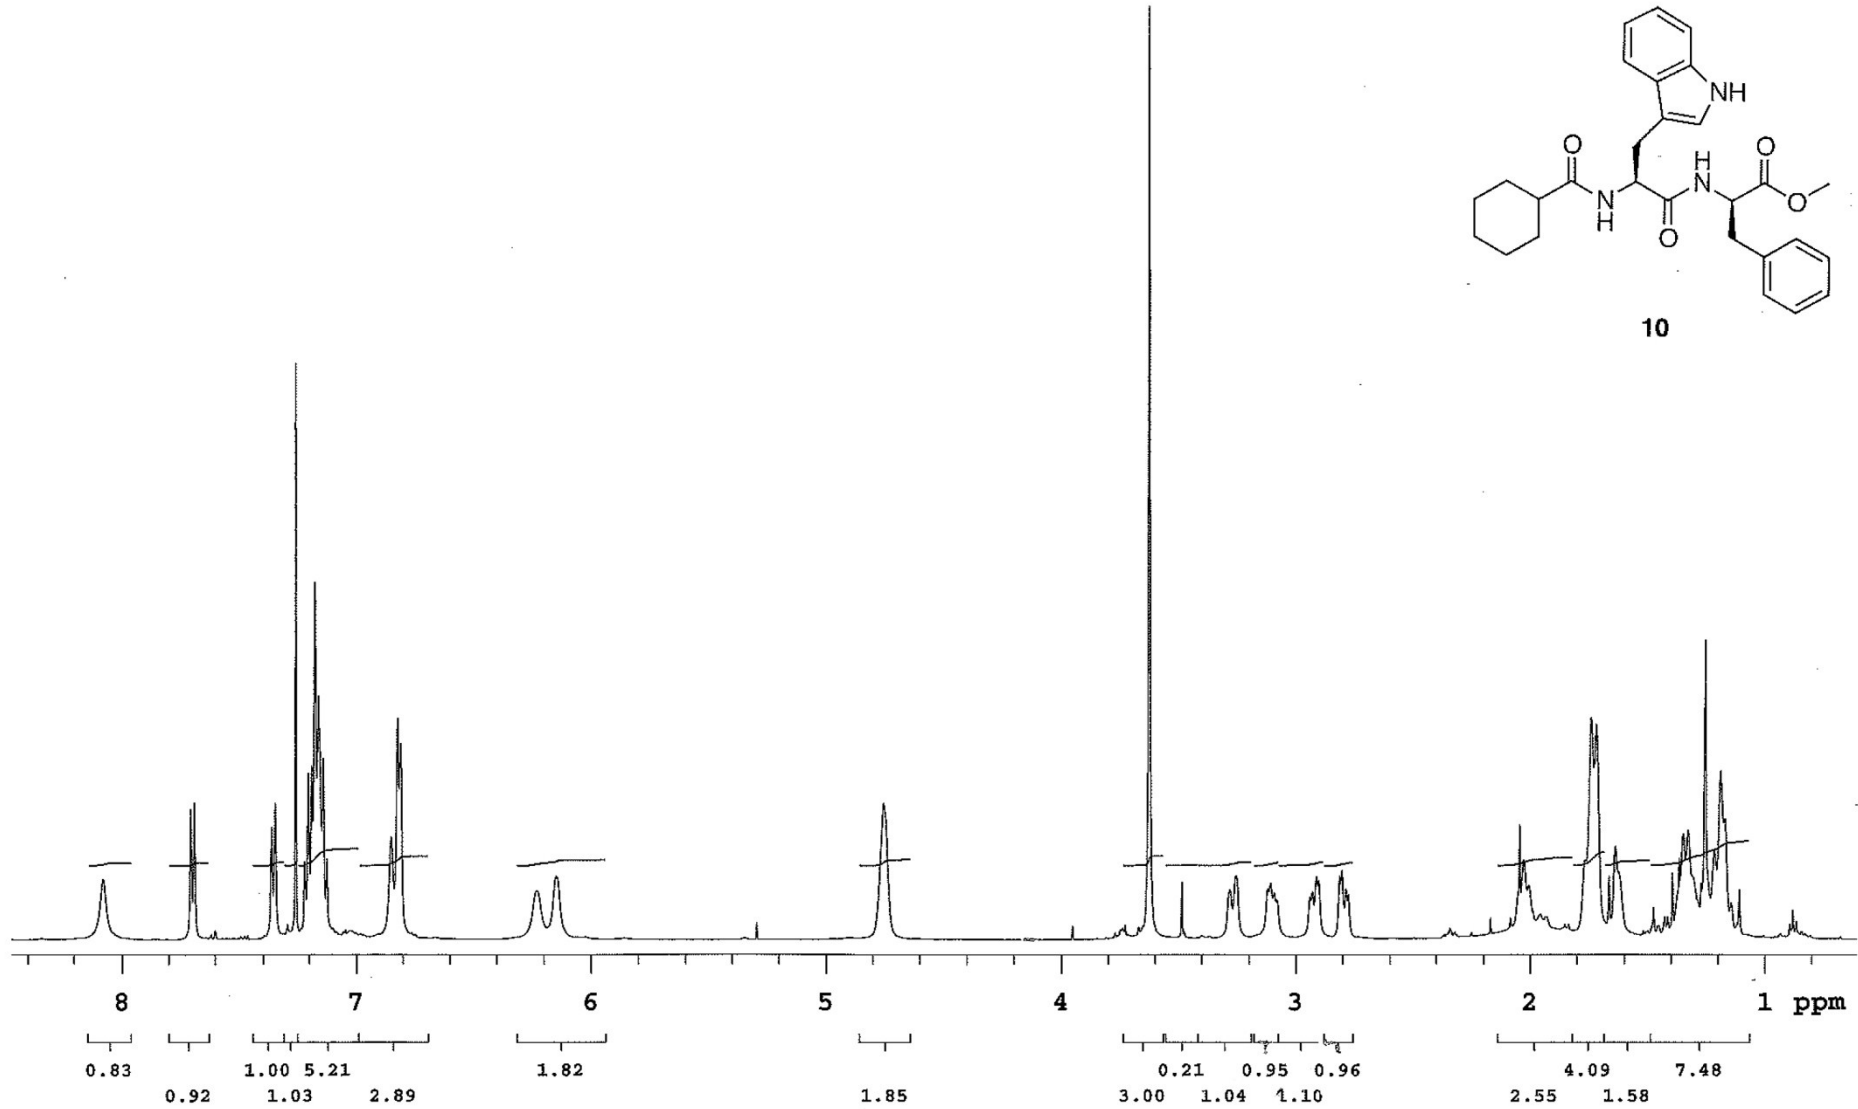

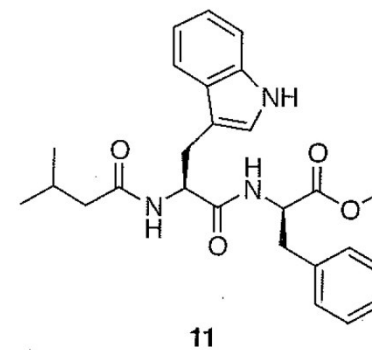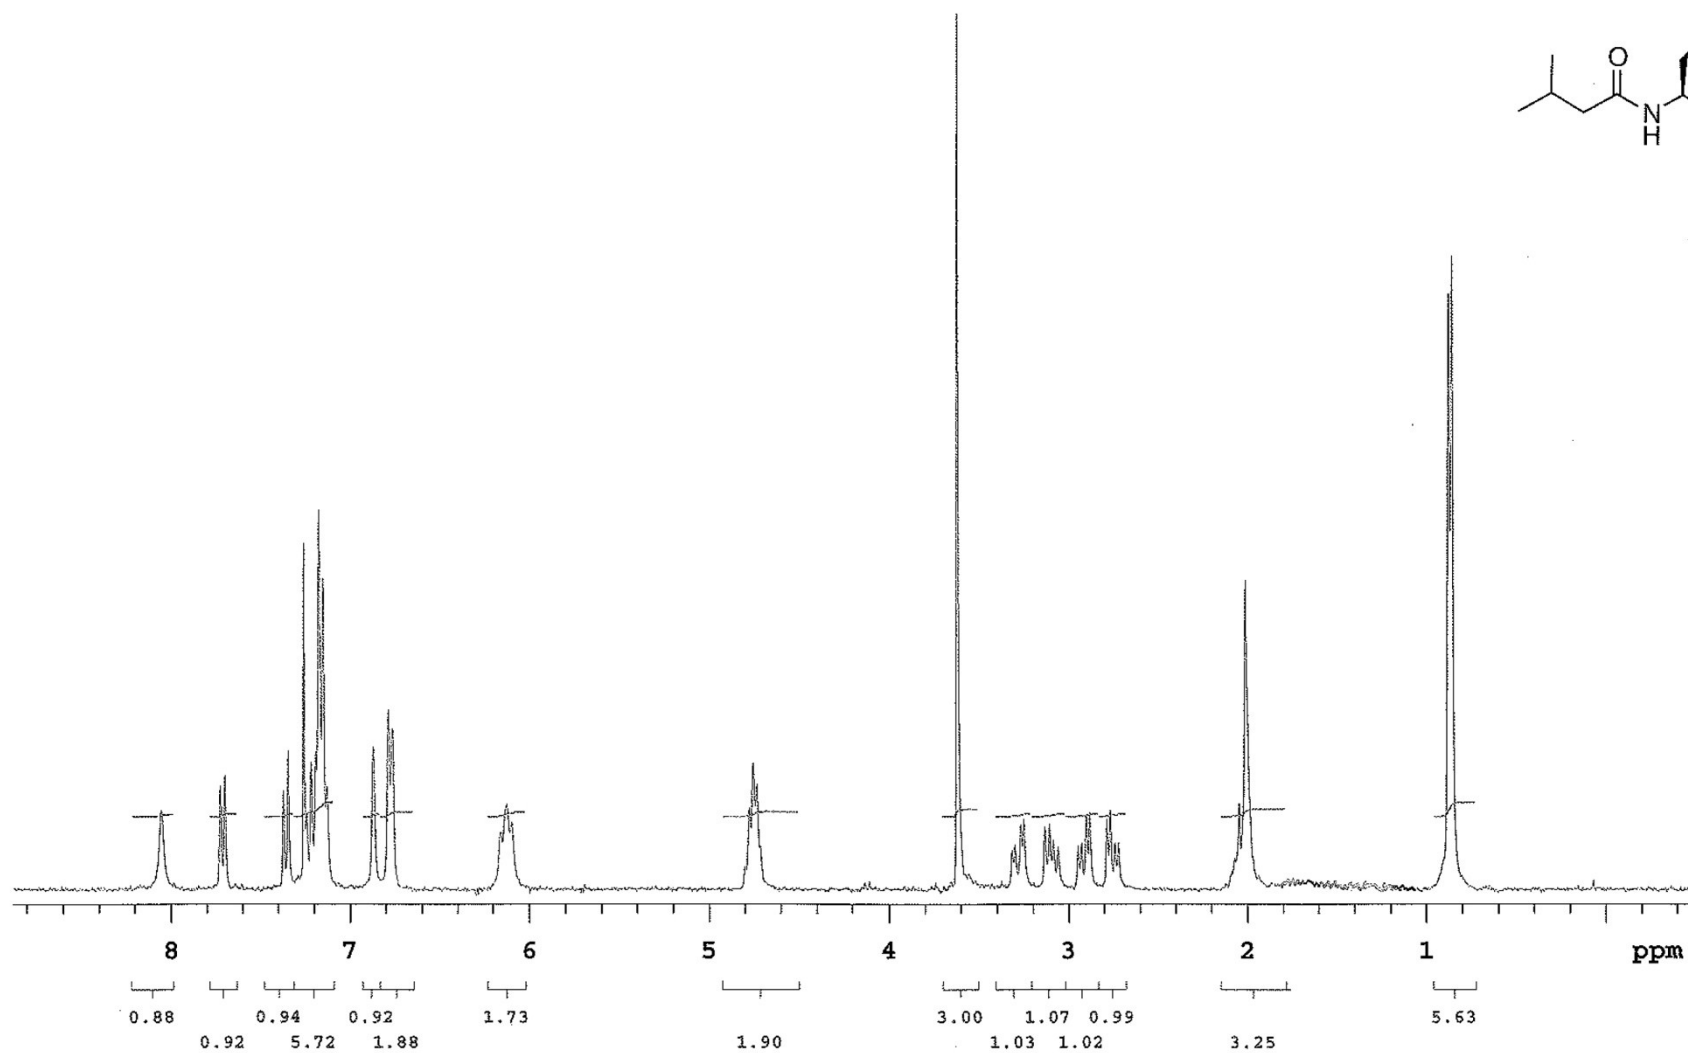

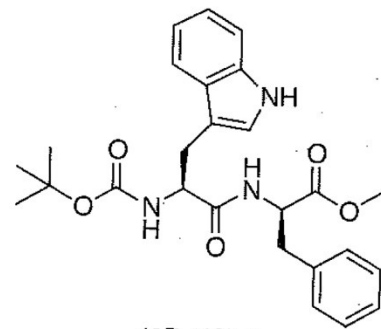

(2R,2'S)-8

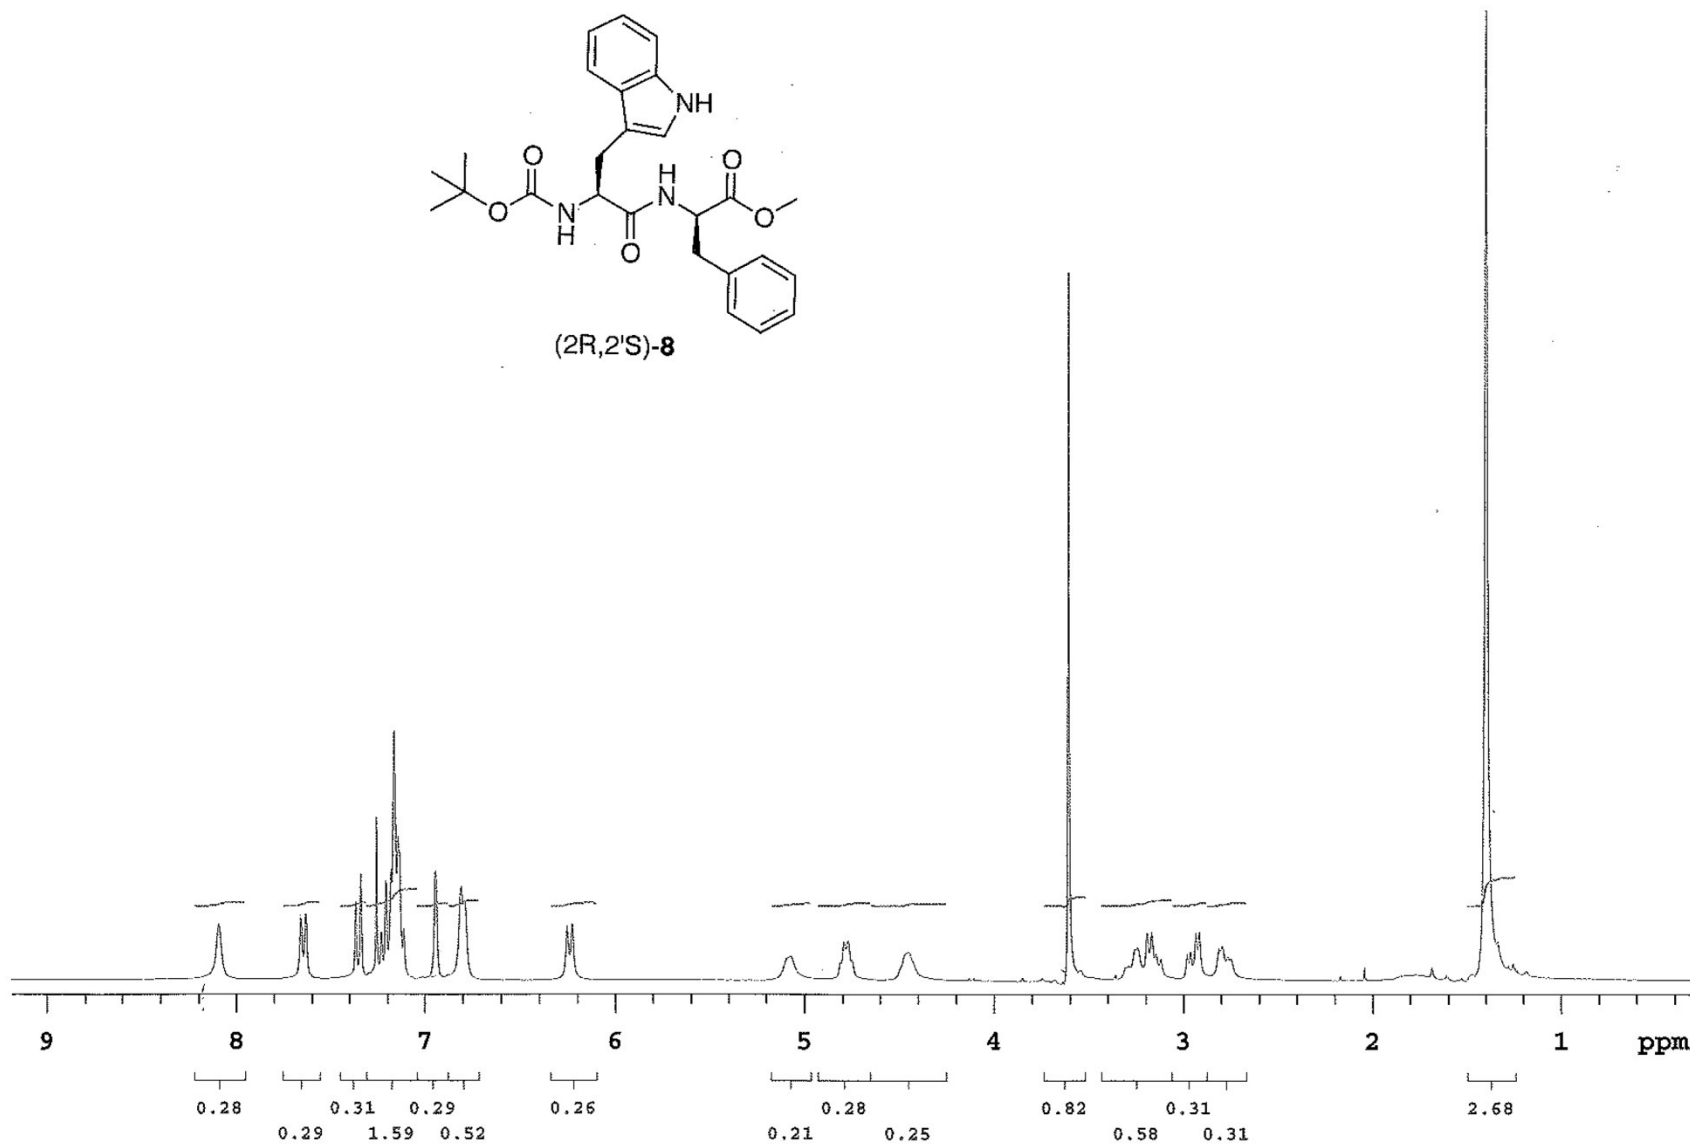



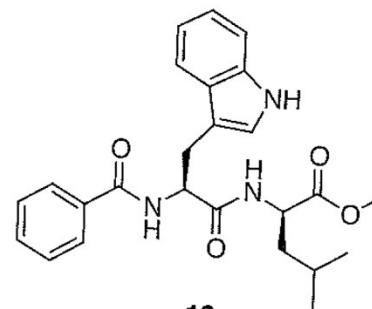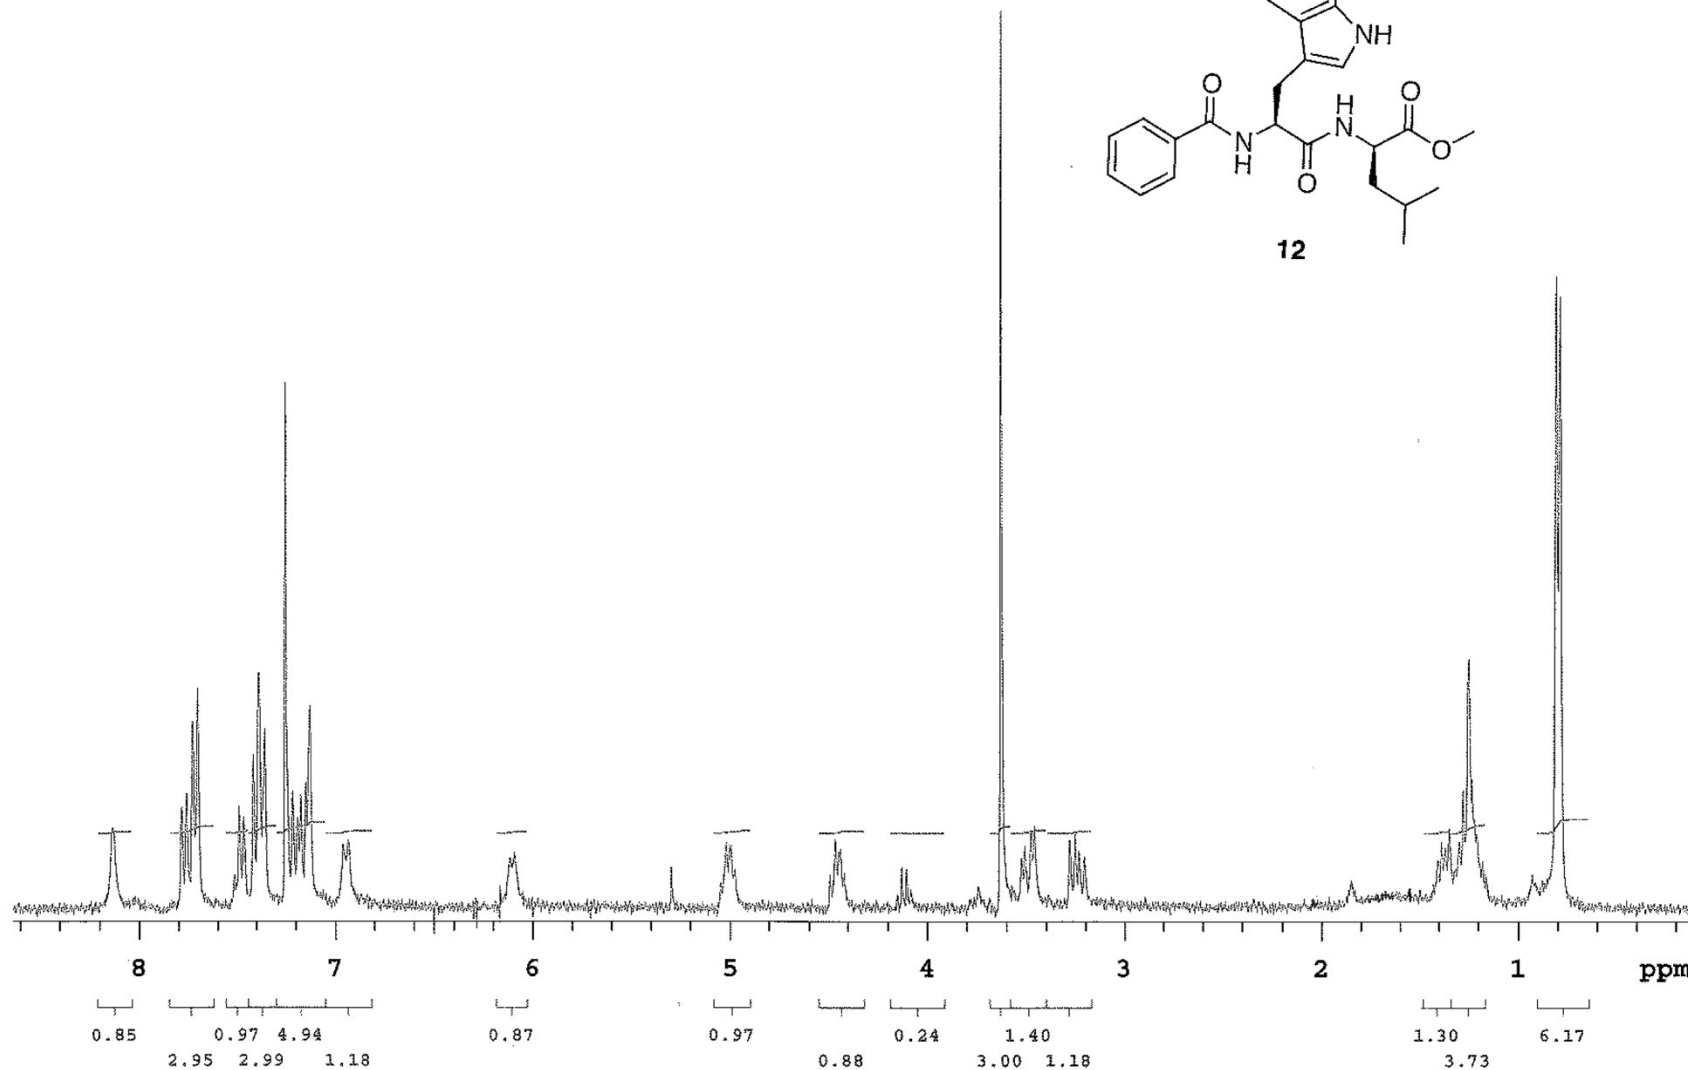

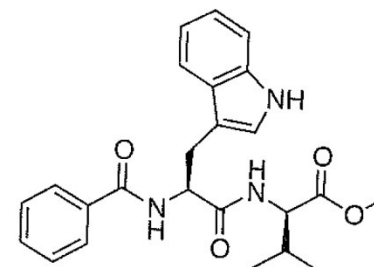

13

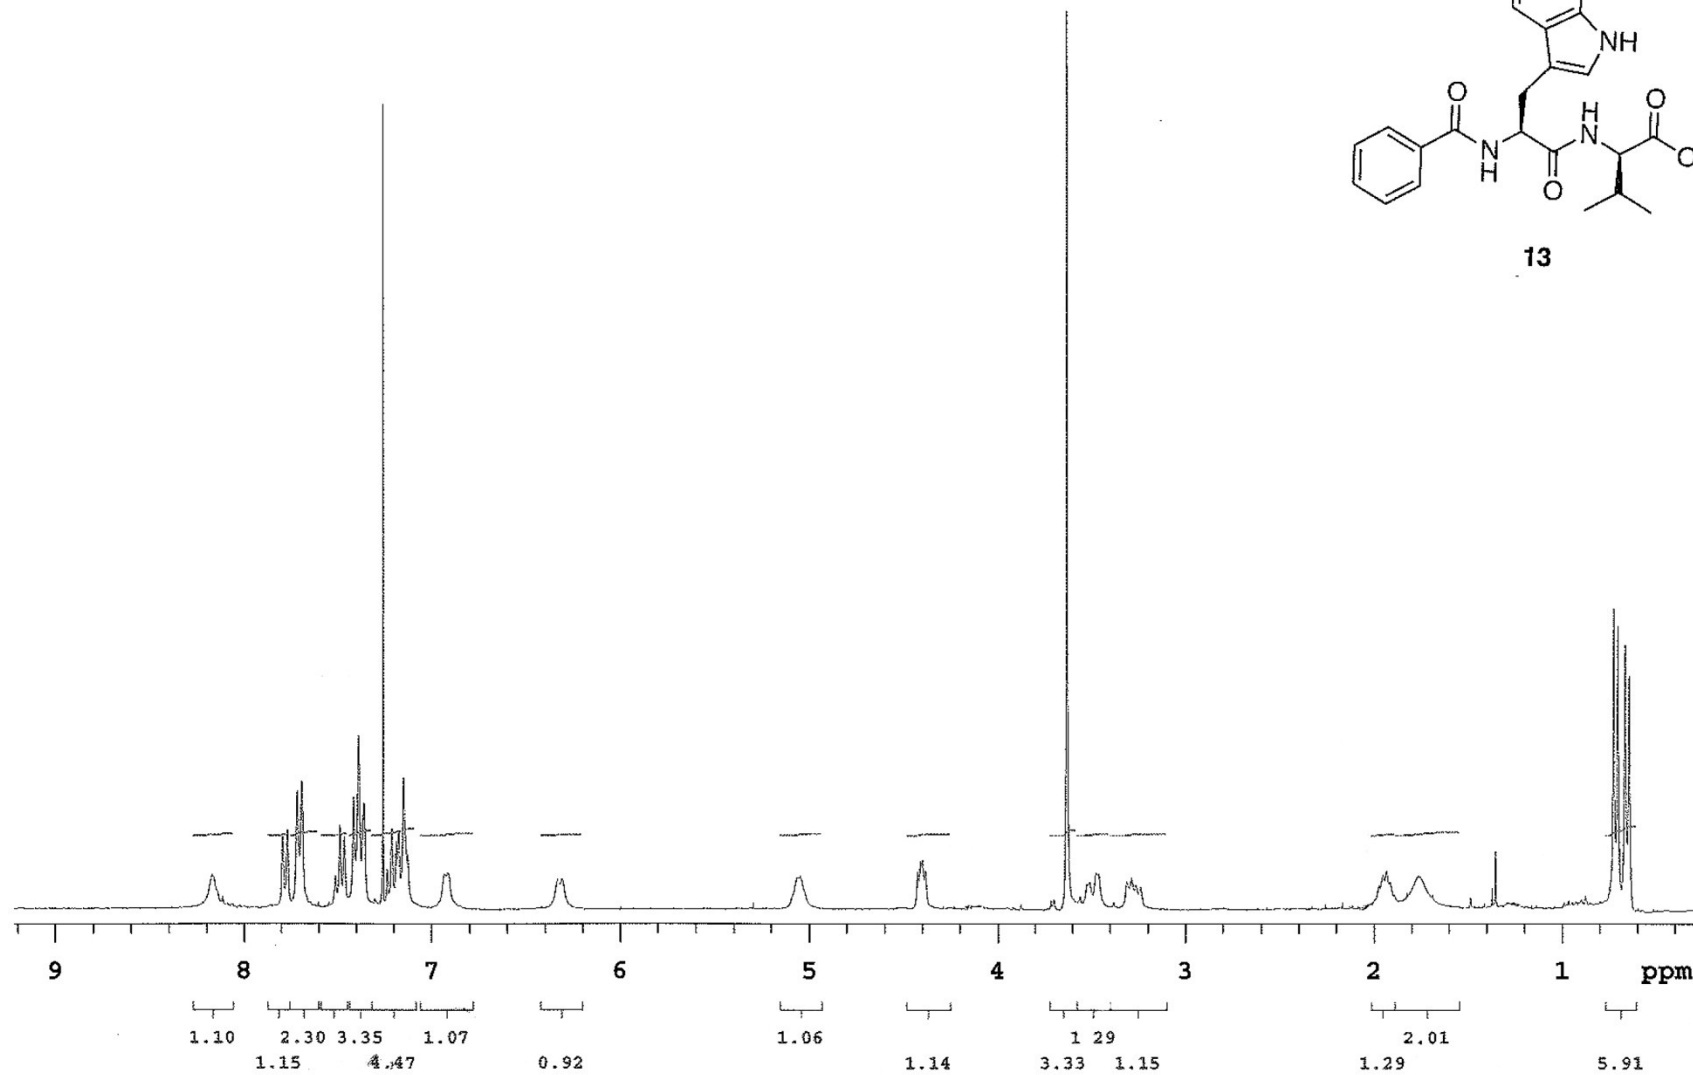

Supplement: c9md00336c1.pdf [file c9md00336c1.pdf]
